# Supplementary material for: ZnO@ZIF-8 core–shell heterostructures with improved photocatalytic activity
Source: Royal Society of Chemistry journal article supplement (doi:10.1039/d1ce00559f), 2021-01-01
Supplement: d1ce00559f1.pdf [file d1ce00559f1.pdf]

## Electronic Supplementary Information

### **ZnO@ZIF-8 core-shell heterostructures with improved photocatalytic activity**

Mei-Hua Chen, Qian-Ying Lu, Yi-Ming Li\*, Ming-Ming Chu\* and Xue-Bo Cao\*

*1 College of Biological, Chemical Sciences and Engineering, Jiaying University, Jiaying, 314001, China*

*\*Corresponding authors*

*E-mail: liyiming@zjxu.edu.cn (Y. Li)*

*E-mail: chumingming@zjxu.edu.cn (M. Chu)*

*E-mail: xbcao@zjxu.edu.cn (X. Cao)*

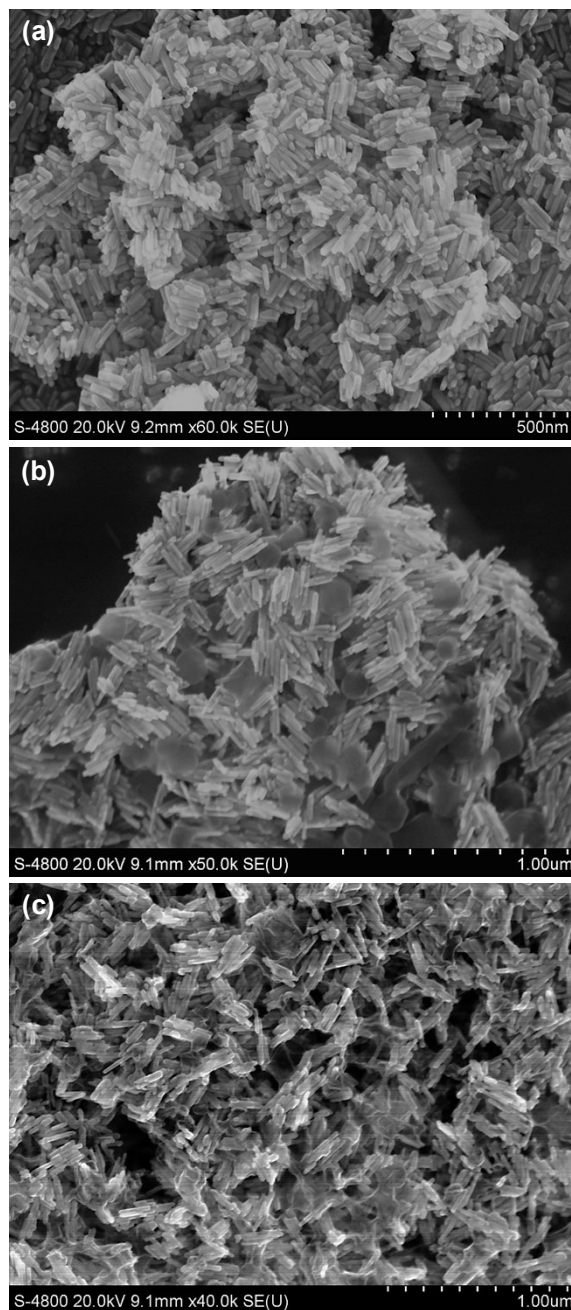

**Fig. S1** (a) SEM image of ZnO@ZIF-8 with a concentration of 2 mg/mL. (b) SEM image of ZnO@ZIF-8 with a concentration of 5 mg/mL. (c) SEM image of ZnO@ZIF-8 with a concentration of 10 mg/mL.

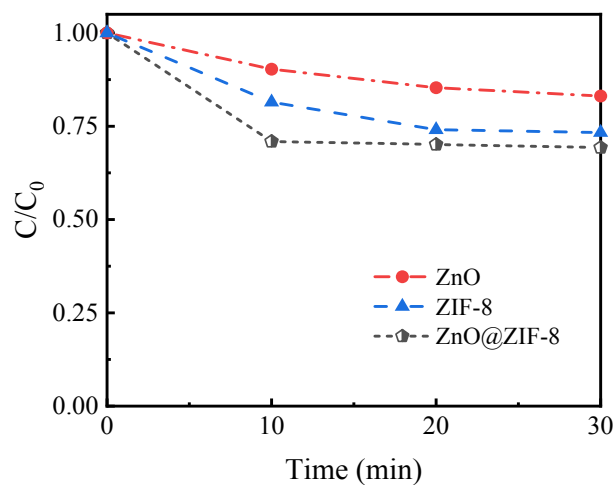

**Fig. S2** Dark adsorption experiments of ZnO, ZIF-8, and ZnO@ZIF-8 for MB. The as-prepared nanoparticles (50 mg) were mixed with 50 mL  $1.0 \times 10^{-5}$  mol/L MB solution (3.19 mg/L) under magnetic stirring for 30 min in darkness to uniformly disperse the photocatalyst powder. 1 mL of the liquid part was collected from the mixed solution every 10 min with a syringe and filtered using a microporous membrane (0.22  $\mu$ m).

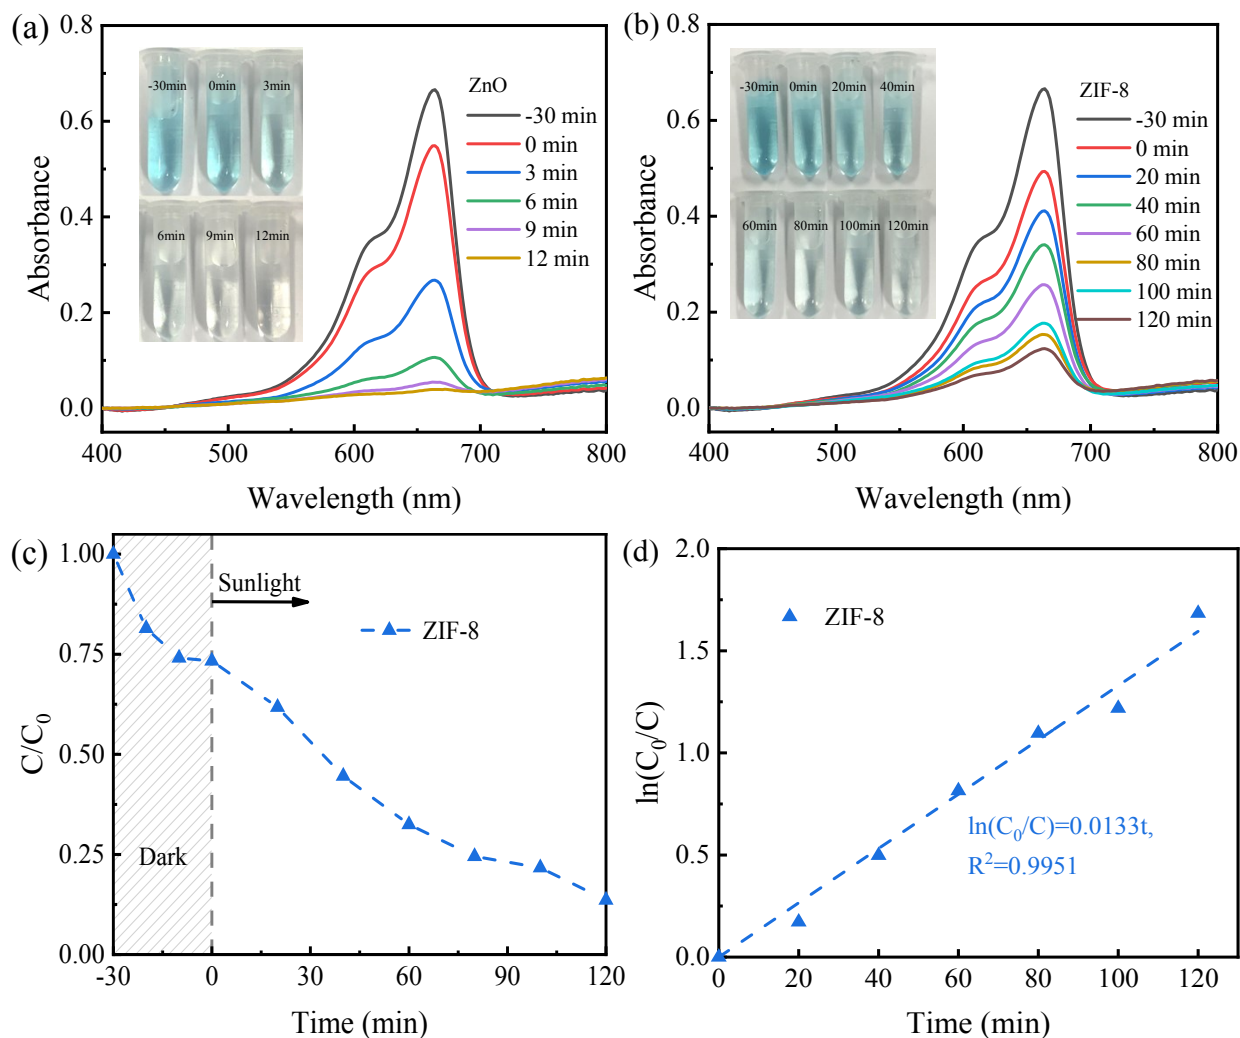

**Fig. S3** Time-dependent UV–Vis absorption spectra for the MB degradation using (a) ZnO photocatalyst and (b) ZIF-8 photocatalyst. (Inset a and b: photographs of color change of photodegradation reaction solution). (c) Photocatalytic degradation of MB in aqueous solution using ZIF-8 photocatalyst. (d) Plots of  $\ln(C_0/C)$  vs reaction time for the MB photocatalytic degradation using ZIF-8 photocatalyst. 50 mg of photocatalyst was added to 50 mL of  $1.0 \times 10^{-5}$  M dye aqueous solution.

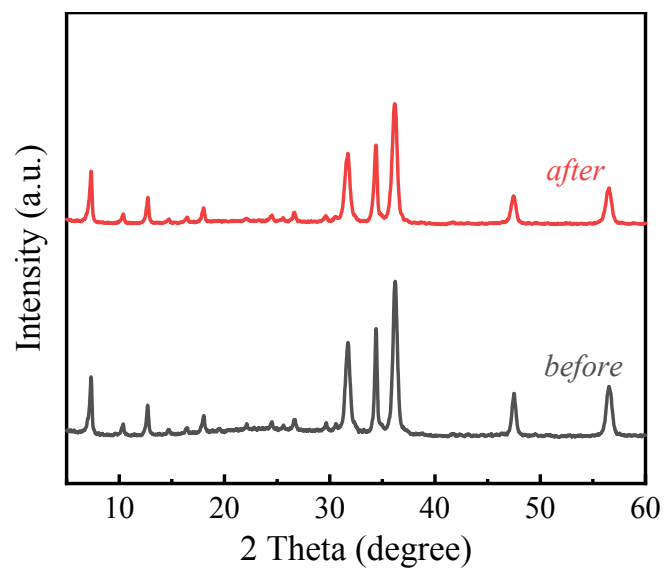

**Fig. S4** XRD patterns of the ZnO@ZIF-8 after the cyclic experiment

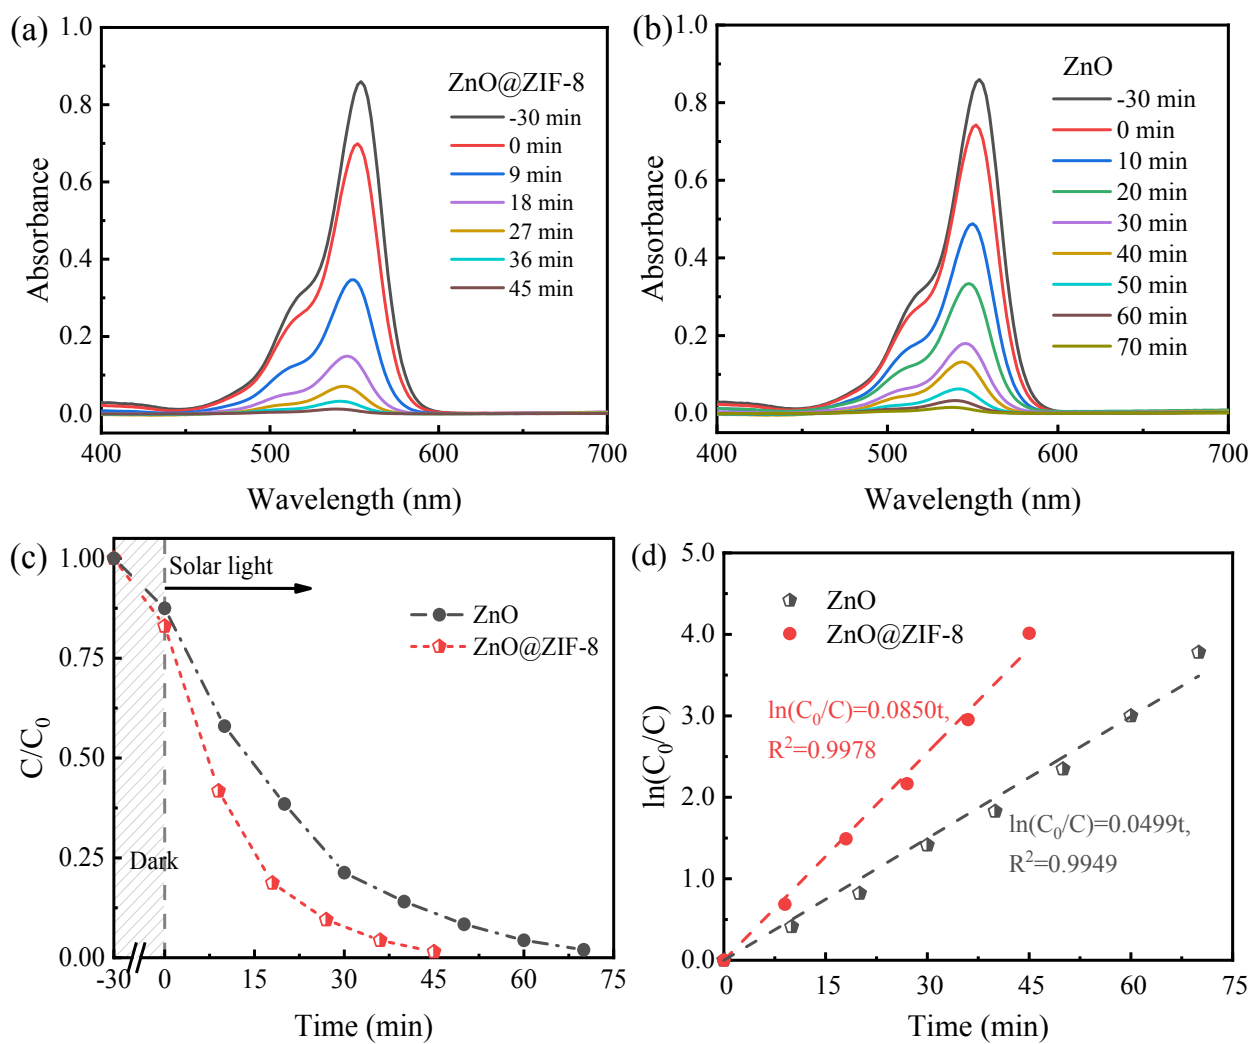

**Fig. S5** Time-dependent UV-Vis absorption spectra for the Rhodamine B (RhB) degradation using ZnO@ZIF-8 (a) and (b) ZnO photocatalyst. (c) Photocatalytic degradation of RhB in aqueous solution using different photocatalyst nanoparticles. (d) Plots of  $\ln(C_0/C)$  vs reaction time for the RhB photocatalytic degradation using various photocatalyst nanoparticles. 50 mg of photocatalyst was added to 50 mL of  $1.0 \times 10^{-5}$  M dye aqueous solution.

The position of the valence band (VB) and the conduction band (CB) can be calculated according to the following formulas:

$$E_{VB} = X - E^e + 0.5E_g \quad (1)$$

$$E_{CB} = E_{VB} - E_g \quad (2)$$

where  $E_{VB}$  is the band edge of the VB,  $E_{CB}$  is the band edge of the CB,  $X$  is the electronegativity average of the atoms, and  $E^e$  is the energy of the free electrons at the hydrogen level (about 4.5 eV).<sup>1</sup> The bandgap values derived from these spectra were 3.12 and 3.17 eV for the ZnO and ZnO@ZIF-8 nanorods, respectively (Fig. S6b). Since the  $X$  value of ZnO is 5.79,<sup>2</sup> the VB and CB of ZnO are calculated to be 2.85 eV and -0.27 eV combined with the above formula. The measured VB of ZIF-8 is reported as 1.60 eV,<sup>3</sup> thus, the CB edge position of ZIF-8 can be calculated as -3.40 eV. In addition, the lowest unoccupied molecular orbital (LUMO) and the highest occupied molecular orbital (HOMO) of MB were -0.94 eV and 0.92 eV, respectively.<sup>4</sup>

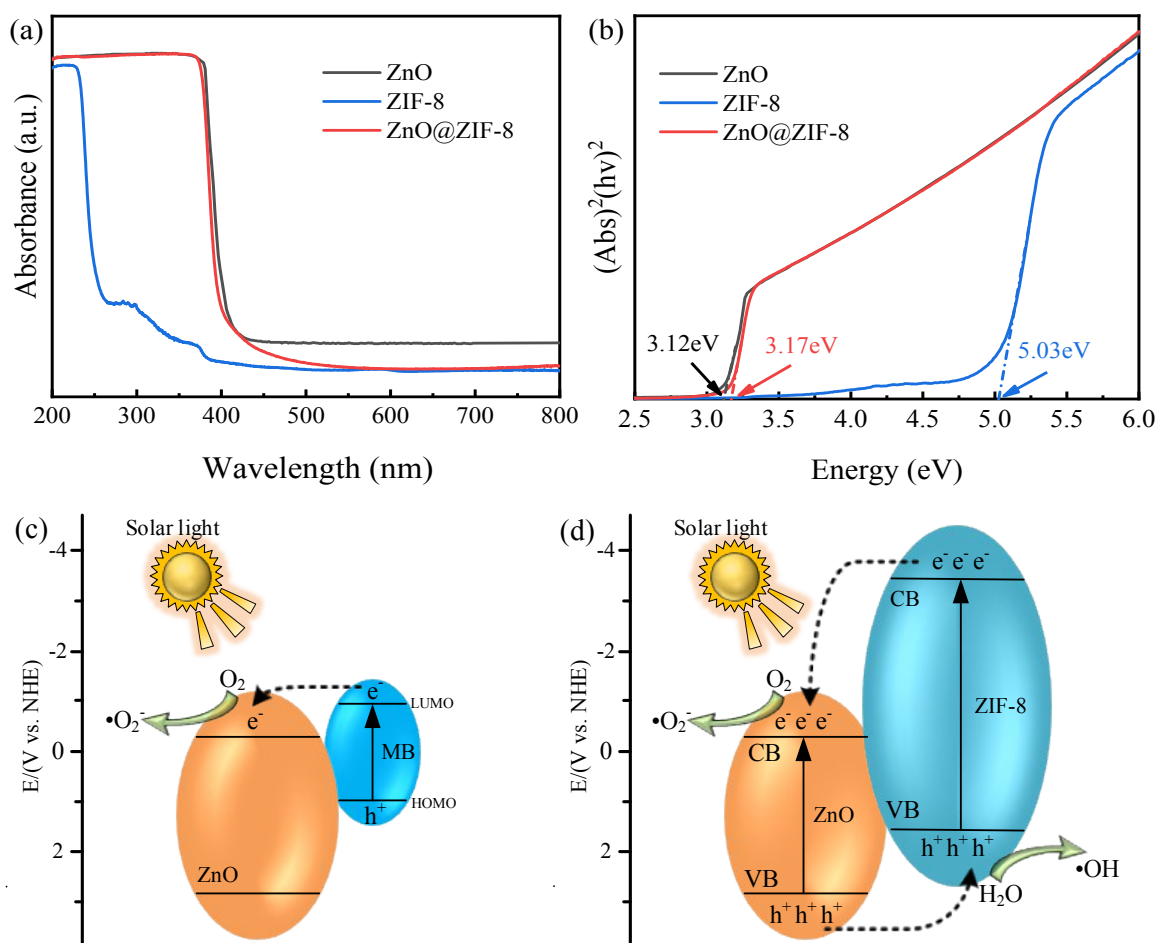

**Fig. S6** (a) UV-Vis absorption spectra and (b) band gap measurement of ZnO nanorods, ZIF-8 and ZnO@ZIF-8 heterostructures. (c) Schematic illustration of sensitized MB molecule may transfer electrons to the CB of ZnO. (d) Schematic illustration for the path of photogenerated charge transfer in ZnO@ZIF-8.

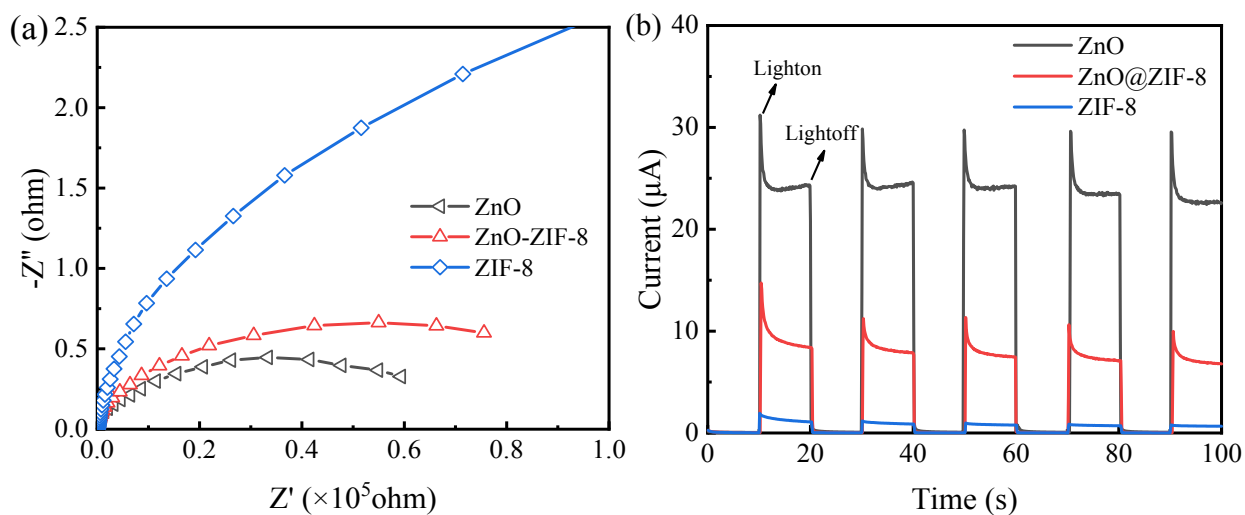

**Fig. S7** (a) Electrochemical impedance spectra and (b) Transient photocurrent response curves of ZnO and ZnO@ZIF-8. In the three-electrode system, the FTO glasses grown with the as-prepared samples with a light area of  $1 \text{ cm}^2$  acted as working electrode when working, while a platinum wire and saturated calomel electrode acted as auxiliary electrode and reference electrode, respectively.



**Table S1** Photocatalytic degradation performance of the ZnO-based materials

| <i>Enhanced method</i>     | <i>Dyes</i> | <i>Light source</i>                                           | $m_s$<br>mg/mL | $C_0$<br>mg/L | $t$<br>min | <i>Degradation efficiency</i> /% | <i>Ref.</i>                       |
|----------------------------|-------------|---------------------------------------------------------------|----------------|---------------|------------|----------------------------------|-----------------------------------|
| ZnO                        | MO          | A 15-W UV light-tube (365 nm)                                 | 1.25           | 10            | 120        | 100                              | Tian et al. <sup>5</sup>          |
| Au-doped Au@ZnO            | MB          | A 300 W Xenon lamp                                            | 0.5            | 16            | 20         | 100                              | Jung et al. <sup>6</sup>          |
| Ag/ZnO nanorods array      | MB          | A low-pressure fluorescent Hg lamp                            | /              | 2             | 60         | 49.3                             | Ren et al. <sup>7</sup>           |
| Fe-doped ZnO nanoflowers   | RhB         | A high-pressure UV mercury lamp                               | 1              | 10            | 180        | 94                               | Yi et al. <sup>8</sup>            |
| Eu-doped ZnO               | MB, MO      | A 300 W Osram Vitalux lamp                                    | 1              | 10            | 150<br>60  | 90<br>100                        | Trandafilović et al. <sup>9</sup> |
| Dy-doped ZnO nanoparticles | AR17        | A 100 W visible lamp                                          | 1              | 5             | 180        | 67                               | Khataee et al. <sup>10</sup>      |
| Ce-doped ZnO               | DR-23       | A 125 W low pressure mercury lamp                             | 0.5            | 40            | 70         | 99.5                             | Kumar et al. <sup>11</sup>        |
| P-containing ZnO           | RhB         | A 300 W halogen lamp with a wavelength ( $\lambda$ ) > 375 nm | 0.5            | 5             | 180        | 99                               | Saffari et al. <sup>12</sup>      |
| S-Doped ZnO                | RhB         | A halogen lamp ( $\lambda > 400$ nm)                          | /              | 5             | 90         | 100                              | Mirzaeifard et al. <sup>13</sup>  |
| C, N co-doped ZnO          | MO          | A xenon lamp (380–800 nm, XQ350W)                             | 0.5            | 10            | 150        | 99                               | Zheng et al. <sup>14</sup>        |
| ZnS-modified ZnO           | MO          | Four UV lamps with a wavelength centered at 254 nm            | 0.5            | 10            | 60         | 93.7                             | Yu et al. <sup>15</sup>           |
| CuO/ZnO                    | MB          | Asahi spectra (MAX 303, 500 W, Japan) as light source         | 1              | 10            | 25         | 96.6                             | Bharathi et al. <sup>16</sup>     |
| TiO <sub>2</sub> /ZnO/rGO  | MB, RhB,    | A Xenon 300-W lamp solar simulator                            | 0.5            | 20            | 180        | 83.5,<br>80.3,                   | Nguyen et al. <sup>17</sup>       |

| MO                                                        |        |                                                          |     |        |     |      |                              |
|-----------------------------------------------------------|--------|----------------------------------------------------------|-----|--------|-----|------|------------------------------|
| ZnO/Ag/Ag <sub>2</sub> O                                  | Phenol | A 300 W Xe arc lamp                                      | 1   | 20     | 75  | 95   | Feng et al. <sup>18</sup>    |
| Fe <sub>3</sub> O <sub>4</sub> @SiO <sub>2</sub> @ZnO/CdS | RhB    | A 250 W Xe lamp equipped with a 420 nm cut-off filter    | 1   | 7      | 180 | 97   | Yang et al. <sup>19</sup>    |
| ZnO/polypyrrole composite                                 | DB22   | A lamp (Avant, mercury vapor 125W, 280-380nm)            | 2   | 50     | 60  | 83.6 | Ceretta et al. <sup>20</sup> |
| ZnO@Zeolite A                                             | RhB    | An 18 W UV lamp with a maximum emission of about 365 nm  | 1   | 10     | 45  | 90   | Du et al. <sup>21</sup>      |
| ZIF-8                                                     | MB     | A 500 W Hg lamp                                          | 0.5 | 10     | 120 | 82.3 | Jing et al. <sup>22</sup>    |
| ZnO@ZIF-8                                                 | MB     | Solar light                                              | 1   | 3.19   | 4.5 | ~100 | This work                    |
| ZnO-ZIF-8                                                 | MO, MB | Eight black fluorescent lamps (Philips TL 15 W/5 BLB)    | 1   | 3.27   | 70  | ~100 | Tuncel et al. <sup>23</sup>  |
| ZnO@ZIF-8                                                 | MB     | A 300 W high pressure Hg lamp                            | 1   | 10 ppm | 240 | 94.1 | Yu et al. <sup>24</sup>      |
| ZnO@ZIF-8                                                 | Cr(VI) | UVP Pen-Ray mercury lamp (USA) with wavelength of 254 nm | 1   | 20     | 240 | 88   | Wang et al. <sup>25</sup>    |

**Table S2** Core diameters (ZnO) and shell thicknesses (ZIF-8) of ZnO@ZIF-8

| <i>Ref.</i>               | <i>Morphology</i> | <i>Pristine ZnO</i>                             | <i>shell thickness</i>    |                |
|---------------------------|-------------------|-------------------------------------------------|---------------------------|----------------|
|                           |                   |                                                 | <i>core diameter(ZnO)</i> | <i>(ZIF-8)</i> |
| This work                 | Nanorods          | 18 ± 3 nm in diameter<br>120 ± 30 nm in length  | ~16 nm                    | ~3 nm          |
| Yu et al. <sup>24</sup>   | Nanoparticles     | 300 nm                                          | 200~250 nm                | 50~100 nm      |
| Wang et al. <sup>25</sup> | Nanoparticles     | /                                               | 300~400 nm                | ~30 nm         |
| Zhan et al. <sup>26</sup> | Nanorods          | 600 ± 100 nm in diameter<br>15 ± 5 μm in length | 400 ± 25 nm               | 300 ± 25 nm    |

**Table S3** Band gaps of the ZnO and ZnO@ZIF-8

| <i>Ref.</i>                 | <i>Morphology</i> | <i>Band gap /eV</i> |           |
|-----------------------------|-------------------|---------------------|-----------|
|                             |                   | ZnO                 | ZnO@ZIF-8 |
| This work                   | Nanorods          | 3.12                | 3.17      |
| Tuncel et al. <sup>23</sup> | Nanoparticles     | 3.10                | 3.00      |
| Wang et al. <sup>25</sup>   | Nanoparticles     | 3.27                | 3.24      |

## References

1. Z. Jin and Y. Zhang, *Catal. Surv. Asia*, 2020, **24**, 59-69.
2. Z. Ye, J. Li, M. Zhou, H. Wang, Y. Ma, P. Huo, L. Yu and Y. Yan, *Chem. Eng. J.*, 2016, **304**, 917-933.
3. W. L. Zhong, C. Li, X. M. Liu, X. K. Bai, G. S. Zhang and C. X. Lei, *Micropor. Mesopor. Mater.*, 2020, **306**, 110401.
4. M. T. Dejpasand, E. Saievar-Iranizad, A. Bayat, A. Montaghemi and S. R. Ardekani, *Mater. Res. Bull.*, 2020, **128**, 110886.
5. C. Tian, Q. Zhang, A. Wu, M. Jiang, Z. Liang, B. Jiang and H. Fu, *Chem. Commun.*, 2012, **48**, 2858-2860.
6. H. J. Jung, R. Koutavarapu, S. Lee, J. H. Kim, H. C. Choi and M. Y. Choi, *J. Alloys Compd.*, 2018, **735**, 2058-2066.
7. C. Ren, B. Yang, M. Wu, J. Xu, Z. Fu, Y. Lv, T. Guo, Y. Zhao and C. Zhu, *J. Hazard. Mater.*, 2010, **182**, 123-129.
8. S. Yi, J. Cui, S. Li, L. Zhang, D. Wang and Y. Lin, *Appl. Surf. Sci.*, 2014, **319**, 230-236.
9. L. V. Trandafilović, D. J. Jovanović, X. Zhang, S. Ptasinska and M. D. Dramićanin, *Appl. Catal. B Environ.*, 2017, **203**, 740-752.
10. A. Khataee, R. Darvishi Cheshmeh Soltani, Y. Hanifehpour, M. Safarpour, H. Gholipour Ranjbar and S. W. Joo, *Ind. Eng. Chem. Res.*, 2014, **53**, 1924-1932.
11. R. Kumar, A. Umar, G. Kumar, M. S. Akhtar, Y. Wang and S. H. Kim, *Ceram. Int.*, 2015, **41**, 7773-7782.
12. R. Saffari, Z. Shariatinia and M. Jourshabani, *Environ. Pollut.*, 2020, **259**, 113902.
13. Z. Mirzaeifard, Z. Shariatinia, M. Jourshabani and S. M. Rezaei Darvishi, *Ind. Eng. Chem. Res.*, 2020, **59**, 15894-15911.
14. H.-b. Zheng, D. Wu, Y.-l. Wang, X.-p. Liu, P.-z. Gao, W. Liu, J. Wen and E. V. Rebrov, *J. Alloys Compd.*, 2020, **838**, 155219.
15. L. H. Yu, W. Chen, D. Z. Li, J. B. Wang, Y. Shao, M. He, P. Wang and X. Z. Zheng, *Appl. Catal. B Environ.*, 2015, **164**, 453-461.
16. P. Bharathi, S. Harish, J. Archana, M. Navaneethan, S. Ponnusamy, C. Muthamizhchelvan, M. Shimomura and Y. Hayakawa, *Appl. Surf. Sci.*, 2019, **484**, 884-891.
17. C. H. Nguyen, M. L. Tran, T. T. V. Tran and R.-S. Juang, *Sep. Purif. Technol.*, 2020, **232**, 115962.
18. C. Feng, Z. Chen, J. Jing and J. Hou, *J. Mater. Chem. C*, 2020, **8**, 3000-3009.
19. J. Yang, J. Wang, X. Li, D. Wang and H. Song, *Catal. Sci. Technol.*, 2016, **6**, 4525-4534.
20. M. B. Ceretta, Y. Vieira, E. A. Wolski, E. L. Foletto and S. Silvestri, *J. Water Process. Eng.*, 2020, **35**, 101230.
21. G. Du, P. Feng, X. Cheng, J. Li and X. Luo, *J. Solid State Chem.*, 2017, **255**, 215-218.
22. H. P. Jing, C. C. Wang, Y. W. Zhang, P. Wang and R. Li, *RSC Adv.*, 2014, **4**, 54454-54462.
23. D. Tuncel and A. N. Ökte, *Catal. Today*, 2020, **361**, 191-197.

24. B. Yu, F. Wang, W. Dong, J. Hou, P. Lu and J. Gong, *Mater. Lett.*, 2015, **156**, 50-53.
25. X. B. Wang, J. Liu, S. Leong, X. C. Lin, J. Wei, B. Kong, Y. Xu, Z. X. Low, J. F. Yao and H. T. Wang, *ACS Appl. Mater. Interfaces*, 2016, **8**, 9080-9087.
26. W. W. Zhan, Q. Kuang, J. Z. Zhou, X. J. Kong, Z. X. Xie and L. S. Zheng, *J. Am. Chem. Soc.*, 2013, **135**, 1926-1933.
